# Supplementary material for: Whole Transcriptome Analysis of Substantia Nigra in Mice with MPTP-Induced Parkinsonism Bearing Defective Glucocerebrosidase Activity
Source: MDPI journal article supplement (doi:10.3390/ijms241512164), 2023-07-29
Supplement: s1 [file s1]

**Table S1.** Differentially expressed genes in SN from mice with MPTP+CBE compared to mice with CBE

| <b>DEGs</b>     | <b>p-value</b>        | <b>Log2FoldChange</b> |
|-----------------|-----------------------|-----------------------|
| <i>Mirg</i>     | 5.87*10 <sup>-6</sup> | 0.59399156            |
| <i>Arap2</i>    | 1.66*10 <sup>-5</sup> | -0.64772314           |
| <i>Pcgf2</i>    | 5.94*10 <sup>-5</sup> | 0.64560150            |
| <i>Klhl11</i>   | 1.42*10 <sup>-4</sup> | -1.97081617           |
| <i>Dbn1</i>     | 3.47*10 <sup>-4</sup> | 0.61752537            |
| <i>Ryr1</i>     | 3.52*10 <sup>-4</sup> | 1.30517771            |
| <i>Slc24a2</i>  | 4.68*10 <sup>-4</sup> | -0.84869852           |
| <i>Ankrd63</i>  | 4.84*10 <sup>-4</sup> | 4.26887775            |
| <i>Tbx2</i>     | 4.97*10 <sup>-4</sup> | 1.17503584            |
| <i>Zc3h12c</i>  | 5.89*10 <sup>-4</sup> | -0.60031129           |
| <i>Kif5b</i>    | 6.15*10 <sup>-4</sup> | -0.63478363           |
| <i>Zfp831</i>   | 6.75*10 <sup>-4</sup> | 2.89086435            |
| <i>Atp13a5</i>  | 6.95*10 <sup>-4</sup> | 0.73688808            |
| <i>Mef2c</i>    | 0.00118040            | 1.07138316            |
| <i>Neto2</i>    | 0.00121295            | -0.65772502           |
| <i>Syne4</i>    | 0.00136080            | 0.72538958            |
| <i>Crocc</i>    | 0.00213178            | 0.76535787            |
| <i>Adam8</i>    | 0.00264611            | 0.80238999            |
| <i>Prmt8</i>    | 0.00264718            | 0.60765600            |
| <i>Cdk3</i>     | 0.00323735            | 1.30858203            |
| <i>Hecw1</i>    | 0.00341241            | -0.62433392           |
| <i>Tnfrsf25</i> | 0.00406376            | 1.07777881            |
| <i>Thbs3</i>    | 0.00469813            | 0.58576518            |

SN – substantia nigra; MPTP - 1-methyl-4-phenyl-1,2,3,6-tetrahydropyridine; CBE - conduritol B epoxide; DEGs - differentially expressed genes

**Table S2.** Differentially expressed genes in SN from mice with MPTP+CBE compared to mice with vehicle

| <b>DEGs</b>    | <b>p-value</b>        | <b>Log2FoldChange</b> |
|----------------|-----------------------|-----------------------|
| <i>Arl4d</i>   | 1.91*10 <sup>-7</sup> | -1.83005951           |
| <i>Pdk4</i>    | 8.24*10 <sup>-7</sup> | -1.01097351           |
| <i>St18</i>    | 5.00*10 <sup>-6</sup> | -0.81759584           |
| <i>Sgk1</i>    | 5.53*10 <sup>-6</sup> | -1.66604096           |
| <i>Arrdc3</i>  | 1.54*10 <sup>-5</sup> | -0.70916389           |
| <i>Neto2</i>   | 7.91*10 <sup>-5</sup> | -0.91135940           |
| <i>Ddit4</i>   | 8.26*10 <sup>-5</sup> | -0.72050667           |
| <i>Rcor2</i>   | 1.91*10 <sup>-4</sup> | 0.75428811            |
| <i>Zfp831</i>  | 1.88*10 <sup>-4</sup> | 3.47671204            |
| <i>Ciart</i>   | 2.93*10 <sup>-4</sup> | -0.58955761           |
| <i>Idi1</i>    | 3.14*10 <sup>-4</sup> | -0.61682728           |
| <i>Ldb2</i>    | 3.26*10 <sup>-4</sup> | 0.67938838            |
| <i>Tlcd4</i>   | 3.51*10 <sup>-4</sup> | -0.59426052           |
| <i>Islr2</i>   | 4.61*10 <sup>-4</sup> | 1.55549782            |
| <i>Till3</i>   | 5.13*10 <sup>-4</sup> | 0.70661232            |
| <i>Ankrd63</i> | 7.55*10 <sup>-4</sup> | 3.69671419            |
| <i>Lrrn1</i>   | 9.82*10 <sup>-4</sup> | -0.60061231           |
| <i>Npy2r</i>   | 0.00103964            | 1.70016592            |
| <i>Slc24a2</i> | 0.00104371            | -0.74572326           |
| <i>Nsun7</i>   | 0.00105934            | 0.89010552            |
| <i>Rhpn2</i>   | 0.00108437            | -0.60907209           |
| <i>Crocc</i>   | 0.00115782            | 0.86478225            |
| <i>Tiam1</i>   | 0.00134855            | 0.66832341            |
| <i>Aldh3b2</i> | 0.00142340            | 1.63789228            |
| <i>Prmt8</i>   | 0.00149763            | 0.69218137            |
| <i>Hsd17b7</i> | 0.00158508            | -0.92862897           |
| <i>Armh4</i>   | 0.00162667            | -0.69704755           |
| <i>Got1l1</i>  | 0.00169645            | 2.02327625            |
| <i>Foxo6</i>   | 0.00182587            | 0.89747095            |
| <i>Tmc4</i>    | 0.00241028            | 0.61771605            |
| <i>Lmo1</i>    | 0.00261155            | 0.59388295            |
| <i>Drc1</i>    | 0.00266271            | 1.09400153            |
| <i>Cdh4</i>    | 0.00293771            | 0.88816271            |
| <i>Mef2c</i>   | 0.00299999            | 0.85976461            |
| <i>Akap5</i>   | 0.00305353            | 0.71494285            |
| <i>Ecel1</i>   | 0.00350562            | 0.89207296            |
| <i>Adora1</i>  | 0.00372698            | -0.58899960           |

SN – substantia nigra; MPTP - 1-methyl-4-phenyl-1,2,3,6-tetrahydropyridine; CBE - conduritol B epoxide; DEGs - differentially expressed genes

**Table S3.** Differentially expressed genes in SN from mice with MPTP+CBE compared to compared to mice with MPTP

| <b>DEGs</b>    | <b>p-value</b>        | <b>Log2FoldChange</b> |
|----------------|-----------------------|-----------------------|
| <i>Sgk1</i>    | 7.34*10 <sup>-5</sup> | -1.39303692           |
| <i>Ucn</i>     | 3.72*10 <sup>-4</sup> | 5.10126015            |
| <i>Arl4d</i>   | 4.55*10 <sup>-4</sup> | -1.06955067           |
| <i>Prmt8</i>   | 0.00140147            | 0.69323273            |
| <i>Popdc3</i>  | 0.00250220            | 0.83564281            |
| <i>Ankrd63</i> | 0.00258946            | 2.58085457            |
| <i>Pik3r6</i>  | 0.00336224            | 1.20161688            |
| <i>Nkx6-1</i>  | 0.00418106            | 0.90280976            |

*SN* – substantia nigra; *MPTP* - 1-methyl-4-phenyl-1,2,3,6-tetrahydropyridine; *CBE* - conduritol B epoxide; *DEGs* - differentially expressed genes

**Table S4.** Differentially expressed genes in SN from mice with MPTP compared to compared to mice with CBE

| <b>DEGs</b>     | <b>p-value</b>        | <b>Log2FoldChange</b> |
|-----------------|-----------------------|-----------------------|
| <i>Parpbbp</i>  | 7.15*10 <sup>-9</sup> | 7.75728016            |
| <i>Pmch</i>     | 1.32*10 <sup>-8</sup> | 6.89975245            |
| <i>Hcrt</i>     | 2.15*10 <sup>-6</sup> | 10.2272463            |
| <i>Ldb2</i>     | 4.73*10 <sup>-5</sup> | 0.80732283            |
| <i>Vangl1</i>   | 1.00*10 <sup>-4</sup> | 0.75320020            |
| <i>H2-Q2</i>    | 3.15*10 <sup>-4</sup> | 1.75304129            |
| <i>Syne4</i>    | 4.42*10 <sup>-4</sup> | 0.85847611            |
| <i>Tox</i>      | 4.56*10 <sup>-4</sup> | 0.94608529            |
| <i>Galr1</i>    | 7.17*10 <sup>-4</sup> | 1.98777749            |
| <i>Calcr</i>    | 0.00123451            | 1.91549766            |
| <i>L3mbtl1</i>  | 0.00178669            | 0.67146595            |
| <i>Nkd2</i>     | 0.00180863            | 0.80701645            |
| <i>Tmem114</i>  | 0.00217489            | 1.87679603            |
| <i>Slc24a2</i>  | 0.00257441            | -0.62294054           |
| <i>Prlhr</i>    | 0.00287968            | 1.74111262            |
| <i>Gabre</i>    | 0.00294519            | 1.37213337            |
| <i>Papln</i>    | 0.00308649            | 0.99136525            |
| <i>Rrad</i>     | 0.00386851            | 1.04071978            |
| <i>Adamts15</i> | 0.00417637            | 0.61223298            |
| <i>Gabrg3</i>   | 0.00420713            | 0.78473896            |
| <i>Plkl1</i>    | 0.00421446            | 0.74063491            |
| <i>Ngb</i>      | 0.00429757            | 0.93952362            |
| <i>Irx6</i>     | 0.00440310            | 1.05900092            |

SN – substantia nigra; MPTP - 1-methyl-4-phenyl-1,2,3,6-tetrahydropyridine; CBE - conduritol B epoxide; DEGs - differentially expressed genes

**Table S5.** Differentially expressed genes in SN from mice with MPTP compared to vehicle mice

| <b>DEGs</b>          | <b>p-value</b>        | <b>Log2FoldChange</b> |
|----------------------|-----------------------|-----------------------|
| <i>Marchf11</i>      | 6.12*10 <sup>-6</sup> | -1.39441538           |
| <i>Ldb2</i>          | 6.97*10 <sup>-6</sup> | 0.92570483            |
| <i>Pmch</i>          | 1.08*10 <sup>-5</sup> | 4.90803528            |
| <i>Parpbp</i>        | 2.51*10 <sup>-5</sup> | 4.87574422            |
| <i>Prlhr</i>         | 4.25*10 <sup>-5</sup> | 4.16288499            |
| <i>Gm5535</i>        | 6.13*10 <sup>-5</sup> | -2.07723070           |
| <i>Plagl2</i>        | 8.40*10 <sup>-5</sup> | 0.79668247            |
| <i>Il11ra1</i>       | 1.27*10 <sup>-4</sup> | -0.73338837           |
| <i>Till3</i>         | 1.47*10 <sup>-4</sup> | 0.81263952            |
| <i>Hcrt</i>          | 3.27*10 <sup>-4</sup> | 5.42990022            |
| <i>Naa38</i>         | 3.52*10 <sup>-4</sup> | -0.59561024           |
| <i>Zfp367</i>        | 3.89*10 <sup>-4</sup> | -0.61555647           |
| <i>Hr</i>            | 4.01*10 <sup>-4</sup> | 0.90706627            |
| <i>Mybl1</i>         | 4.25*10 <sup>-4</sup> | -1.10023703           |
| <i>Tox</i>           | 4.28*10 <sup>-4</sup> | 0.95559851            |
| <i>Galr1</i>         | 4.33*10 <sup>-4</sup> | 2.14210920            |
| <i>Islr2</i>         | 4.74*10 <sup>-4</sup> | 1.55262315            |
| <i>Rxrg</i>          | 4.75*10 <sup>-4</sup> | 1.44305501            |
| <i>Mreg</i>          | 5.17*10 <sup>-4</sup> | -0.90997493           |
| <i>Pradcl</i>        | 5.29*10 <sup>-4</sup> | -0.60925737           |
| <i>Aldh3b2</i>       | 6.37*10 <sup>-4</sup> | 1.86049836            |
| <i>Tead1</i>         | 6.46*10 <sup>-4</sup> | 0.60220973            |
| <i>Gck</i>           | 6.71*10 <sup>-4</sup> | 1.67727679            |
| <i>Gm5805</i>        | 7.07*10 <sup>-4</sup> | -0.97674700           |
| <i>Npsr1</i>         | 8.36*10 <sup>-4</sup> | 1.60982807            |
| <i>Mgst3</i>         | 8.66*10 <sup>-4</sup> | -0.86363937           |
| <i>Cast</i>          | 9.96*10 <sup>-4</sup> | -0.73852800           |
| <i>Pdyn</i>          | 0.00105191            | 1.84914286            |
| <i>Smc4</i>          | 0.00123026            | -0.72789888           |
| <i>Tbc1d4</i>        | 0.00131115            | -0.61766263           |
| <i>Gm10925</i>       | 0.00140480            | -0.64665629           |
| <i>Mapk15</i>        | 0.00141277            | 2.70633496            |
| <i>Armh4</i>         | 0.00149456            | -0.71556109           |
| <i>Cox14</i>         | 0.00154585            | -0.59853593           |
| <i>Inhbb</i>         | 0.00154993            | -0.68488490           |
| <i>Cdh7</i>          | 0.00156830            | -0.67298463           |
| <i>Syne4</i>         | 0.00175996            | 0.68369976            |
| <i>Kif6</i>          | 0.00180070            | 0.86067353            |
| <i>Gabre</i>         | 0.00185505            | 1.56838404            |
| <i>Kcna5</i>         | 0.00200873            | 0.99216274            |
| <i>Cfap54</i>        | 0.00201416            | 1.32978322            |
| <i>Tac2</i>          | 0.00237660            | 2.69816659            |
| <i>Sv2b</i>          | 0.00239419            | -0.88481644           |
| <i>Apod</i>          | 0.00250002            | -0.81569282           |
| <i>Gabrg3</i>        | 0.00258473            | 0.94540467            |
| <i>4933427D14Rik</i> | 0.00261159            | 0.91296547            |
| <i>Amigo2</i>        | 0.00263749            | 0.74983049            |

|                      |            |             |
|----------------------|------------|-------------|
| <i>Plxdc1</i>        | 0.00268039 | 0.64568630  |
| <i>Parp3</i>         | 0.00274272 | -0.67492838 |
| <i>Gm17833</i>       | 0.00286693 | 2.48960962  |
| <i>Rtl5</i>          | 0.00291866 | 0.61842218  |
| <i>Myo18b</i>        | 0.00297219 | 0.71620205  |
| <i>Hsd17b7</i>       | 0.00300901 | -0.79940140 |
| <i>Rskr</i>          | 0.00308534 | 0.81083439  |
| <i>Ngb</i>           | 0.00322447 | 1.11465781  |
| <i>Vamp8</i>         | 0.00349565 | -0.86815506 |
| <i>1700095J03Rik</i> | 0.00395746 | 1.20447328  |
| <i>Krt90</i>         | 0.00400068 | 1.46304392  |
| <i>Rsph4a</i>        | 0.00456301 | 1.20006114  |
| <i>Mycl</i>          | 0.00458642 | 0.62218277  |
| <i>Crocc</i>         | 0.00472544 | 0.60208596  |
| <i>Drc1</i>          | 0.00486860 | 0.83598210  |
| <i>Fbxw7</i>         | 0.00508217 | -0.59395953 |
| <i>Itih3</i>         | 0.00528863 | 0.65943353  |

*SN* – substantia nigra; *MPTP* - 1-methyl-4-phenyl-1,2,3,6-tetrahydropyridine; *DEGs* - differentially expressed genes

**Table S6.** Differentially expressed genes in SN from mice with CBE compared to mice with vehicle

| DEGs        | p-value    | Log2FoldChange |
|-------------|------------|----------------|
| <i>Pomc</i> | 0.00027706 | -2.64777546    |

*SN – substantia nigra; CBE - conduritol B epoxide; DEGs - differentially expressed genes*

**Table S7.** Venn diagram of DEGs in compared study groups

| Groups                                                     | Number of DEGs | DEGs                                                                                                                                                                                                                                                                                |
|------------------------------------------------------------|----------------|-------------------------------------------------------------------------------------------------------------------------------------------------------------------------------------------------------------------------------------------------------------------------------------|
| Common                                                     |                |                                                                                                                                                                                                                                                                                     |
| MPTP+CBE vs CBE<br>MPTP+CBE vs MPTP<br>MPTP+CBE vs vehicle | 2              | <i>Ankrd63, Prmt8</i>                                                                                                                                                                                                                                                               |
| MPTP vs CBE<br>MPTP+CBE vs CBE<br>MPTP+CBE vs vehicle      | 1              | <i>Slc24a2</i>                                                                                                                                                                                                                                                                      |
| MPTP vs vehicle<br>MPTP+CBE vs CBE<br>MPTP+CBE vs vehicle  | 1              | <i>Crocc</i>                                                                                                                                                                                                                                                                        |
| MPTP vs CBE<br>MPTP vs vehicle<br>MPTP+CBE vs CB           | 1              | <i>Syne4</i>                                                                                                                                                                                                                                                                        |
| MPTP vs CBE<br>MPTP vs vehicle<br>MPTP+CBE vs vehicle      | 1              | <i>Ldb2</i>                                                                                                                                                                                                                                                                         |
| MPTP+CBE vs CBE<br>MPTP+CBE vs vehicle                     | 3              | <i>Zfp831, Neto2, Mef2c</i>                                                                                                                                                                                                                                                         |
| MPTP+CBE vs MPTP<br>MPTP+CBE vs vehicle                    | 2              | <i>Sgk1, Arl4d</i>                                                                                                                                                                                                                                                                  |
| MPTP vs vehicle<br>MPTP+CBE vs vehicle                     | 6              | <i>Ttll3, Armh4, Hsd17b7, Islr2, Aldh3b2, Drc1</i>                                                                                                                                                                                                                                  |
| MPTP vs CBE<br>MPTP vs vehicle                             | 9              | <i>Hcrt, Pmch, Gabre, Prlhr, Tox, Parpbp, Ngf, Gabrg3, Galr1</i>                                                                                                                                                                                                                    |
| Unique                                                     |                |                                                                                                                                                                                                                                                                                     |
| MPTP+CBE vs CBE                                            | 15             | <i>Hecwl, Klhl11, Mirg, Dbn1, Ryr1, Pcgf2, Kif5b, Thbs3, Adam8, Cdk3, Atp13a5, Tnfrsf25, Arap2, Tbx2, Zc3h12c</i>                                                                                                                                                                   |
| MPTP+CBE vs vehicle                                        | 21             | <i>Adora1, Ddit4, Nsun7, Akap5, Rcor2, Foxo6, Tlcd4, Lmo1, Arrdc3, Pdk4, Npy2r, Stl8, Ciart, Idi1, Tiam1, Tmc4, Lrrn1, Rhpn2, Cdh4, Got111, Ecell</i>                                                                                                                               |
| MPTP+CBE vs MPTP                                           | 4              | <i>Popdc3 Nkx6-1 Pik3r6 Ucn</i>                                                                                                                                                                                                                                                     |
| MPTP vs vehicle                                            | 46             | <i>Itih3, Mreg, Smc4, Mgst3, Cast, Npsr1, Cfap54, Marchf11, Gm5805, Zfp367, Gm5535, Sv2b, Gm10925, Mycl, Vamp8, Fbxw7, Kif6, Mybl1, Apod, Naa38, Plxdc1, Tbc1d4, Amigo2, Pdyn, Tead1, Gck, Inhbb, Rtl5, Mapk15, Rsph4a, Rskr, Hr, 4933427D14Rik, Cox14, Pradc1, Myo18b, Plagl2,</i> |



|                |    |                                                                                        |
|----------------|----|----------------------------------------------------------------------------------------|
|                |    | <i>Irf103, Krt90, Il11ra1, Rxrg, Parp3, Gm17833, Kcna5, Tac2, Cdh7</i>                 |
| MPTP vs CBE    | 11 | <i>H2-Q2, Vangl1, Tmem114, Plk1, Calcr, Nkd2, L3mbtl1, Adamts15, Papln, Irx6, Rrad</i> |
| CBE vs vehicle | 1  | <i>Pomc</i>                                                                            |

*MPTP - 1-methyl-4-phenyl-1,2,3,6-tetrahydropyridine; CBE - conduritol B epoxide; DEGs - differentially expressed genes*

**Table S8.** DEGs of SN of mice with MPTP+CBE vs vehicle mice involved in PI3K/AKT/mTOR pathway based on literature analysis

| Genes        | Number from list of DEGs | p-value               | Log2FoldChange | Association with PI3K/AKT/mTOR pathway                                                                                                                                                                | References |
|--------------|--------------------------|-----------------------|----------------|-------------------------------------------------------------------------------------------------------------------------------------------------------------------------------------------------------|------------|
| <i>Arl4d</i> | 1                        | $1.91 \times 10^{-7}$ | -1.8301        | The expression of ARL4D was found to be post-transcriptionally regulated by the AKT/mTOR pathway and linked to the status of PTEN in human glioma.                                                    | [86]       |
| <i>Pdk4</i>  | 2                        | $8.24 \times 10^{-7}$ | -1.0110        | Knockdown of PDK4 suppressed the tumor development of cancer cells with activated mTORC1. The abundance of PDK4 dictated the responsiveness of cells to the mTOR inhibitor, rapamycin.                | [58]       |
| <i>Sgk1</i>  | 4                        | $5.53 \times 10^{-6}$ | -1.6660        | mTOR, specifically mTORC2, is the hydrophobic motif-kinase for SGK1. Activated SGK1 contributes to the maintenance of residual mTORC1 activity through direct phosphorylation and inhibition of TSC2. | [57,87]    |
| <i>Ddit4</i> | 7                        | $8.26 \times 10^{-5}$ | -0.7205        | DDIT4 is an inhibitor of mTORC1                                                                                                                                                                       | [88]       |

**Table S9.** DEGs of PBMC-derived macrophages of GBA-PD (L444P/N) vs controls involved in PI3K/AKT/mTOR pathway based on literature

| DEGs        | Number from list of DEGs | p-value               | Log2FoldChange | Association with PI3K/AKT/mTOR pathway         | References |
|-------------|--------------------------|-----------------------|----------------|------------------------------------------------|------------|
| <i>EGR1</i> | 3                        | $3.17 \times 10^{-6}$ | -4.1878        | mTORC2 inhibition increases expression of EGR1 | [89,90]    |

|              |   |                       |         |                                                                                                                                                                                                                                                                       |      |
|--------------|---|-----------------------|---------|-----------------------------------------------------------------------------------------------------------------------------------------------------------------------------------------------------------------------------------------------------------------------|------|
|              |   |                       |         | Stimulation of mTORC1 increase expression of Egr1 regardless of its mRNA levels.                                                                                                                                                                                      |      |
| <i>DUSP1</i> | 4 | $3.95 \times 10^{-6}$ | -3.2510 | The activity of ULK1 is negatively regulated by MTOR, and inhibition of MTOR activates ULK, leading to autophagy induction. ULK1 phosphorylates BECN1 at Ser15 and promotes PIK3C3-BECN1-ATG14 complex formation and activation in <i>dusp1</i> <sup>-/-</sup> cells. | [91] |
| <i>IL6</i>   | 5 | $3.95 \times 10^{-6}$ | -3.4155 | IL-6 is a strong activator of mTOR                                                                                                                                                                                                                                    | [92] |
| <i>ARL4C</i> | 6 | $5.06 \times 10^{-6}$ | -2.1475 | AKT/mTOR inhibits ARL4C ubiquitination                                                                                                                                                                                                                                | [64] |
| <i>NR4A2</i> | 7 | $2.94 \times 10^{-4}$ | -3.0012 | Nr4a2 Expression Is Induced by the PI3K-Akt-mTOR Pathway                                                                                                                                                                                                              | [93] |
